# Supplementary material
Source: Springer Nature journal article supplement (https://www.springermedizin.de/resource/supplementary/13006_2009_98_MOESM3_ESM.pdf/9628006)

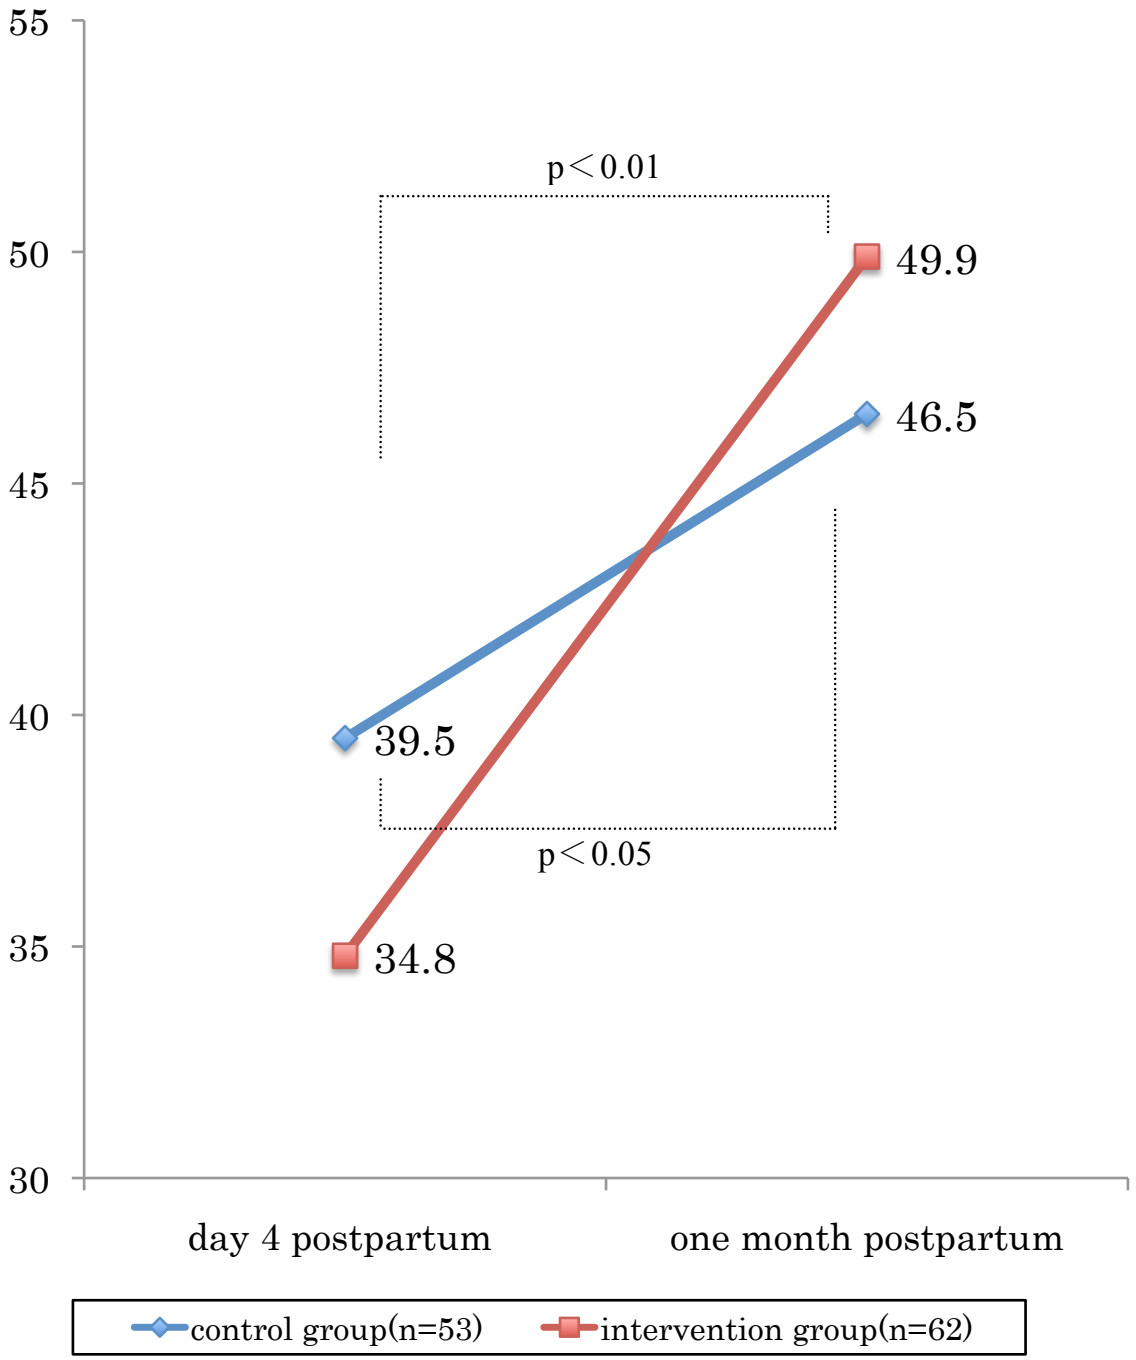

Supplement: MOESM3 [file 9628006]
